# Supplementary material
Source: PubMed Central journal article supplement (PMC1544244)
Supplement: pnas_0601182103_4.pdf [file pnas_0601182103_4.pdf]

**Table 1. The 30 most highly expressed *Y. pestis* genes in the bubo**

| Rank | Gene         | ORF       | Function of the gene product                       | Relative expression* |
|------|--------------|-----------|----------------------------------------------------|----------------------|
| 1    | <i>cafI</i>  | YPMT1.84  | <b>F1 capsule antigen</b>                          | 43.9                 |
| 2    | <i>yopE</i>  | YPCD1.06  | <b>Yop effector protein</b>                        | 32.0                 |
| 3    | —            | YPO3279   | Putative sigma 54 modulation protein               | 30.7                 |
| 4    | <i>groES</i> | YPO0350   | 10 kDa chaperonin                                  | 30.3                 |
| 5    | <i>yopD</i>  | YPCD1.28c | <b>Yop negative regulation/targeting component</b> | 29.2                 |
| 6    | <i>lpp</i>   | YPO2394   | Major outer membrane lipoprotein                   | 27.2                 |
| 7    | <i>pla</i>   | YPPCP1.07 | <b>Plasminogen activator/surface protease</b>      | 27.1                 |
| 8    | <i>infC</i>  | YPO2432   | Translation initiation factor IF-3                 | 24.7                 |
| 9    | <i>rplN</i>  | YPO0220   | 50S ribosomal protein L14                          | 24.3                 |
| 10   | <i>groEL</i> | YPO0351   | 60 kDa chaperonin                                  | 24.0                 |
| 11   | <i>yopH</i>  | YPCD1.67c | <b>Protein-tyrosine phosphatase Yop effector</b>   | 23.8                 |
| 12   | <i>rpsM</i>  | YPO0231   | 30S ribosomal protein S13                          | 22.6                 |
| 13   | <i>uspA</i>  | YPO3970   | Universal stress protein A                         | 18.5                 |
| 14   | <i>metE</i>  | YPO3788   | Homocysteine methyltransferase                     | 18.4                 |
| 15   | —            | YPO2705   | Conserved hypothetical protein                     | 18.3                 |
| 16   | <i>ymt</i>   | YPMT1.74  | <b>Murine toxin/phospholipase D</b>                | 18.0                 |
| 17   | <i>fyuA</i>  | YPO1906   | <b>Pesticin/yersiniabactin receptor protein</b>    | 18.0                 |
| 18   | <i>ail</i>   | YPO2905   | Attachment invasion locus protein                  | 17.9                 |
| 19   | <i>cspE</i>  | YPO2595   | Putative cold shock protein                        | 17.7                 |
| 20   | <i>cafIM</i> | YPMT1.83  | <b>F1 capsule anchoring protein</b>                | 16.9                 |
| 21   | <i>rplE</i>  | YPO0222   | 50S ribosomal protein L5                           | 16.8                 |
| 22   | —            | YPCD1.09c | Hypothetical protein YPCD1.09c                     | 16.7                 |
| 23   | <i>gapA</i>  | YPO2157   | Glyceraldehyde 3-phosphate dehydrogenase A         | 16.7                 |
| 24   | <i>tufA</i>  | YPO0203   | Elongation factor Tu                               | 16.3                 |
| 25   | —            | YPO1649   | Conserved hypothetical protein                     | 15.8                 |
| 26   | <i>ybtS</i>  | YPO1916   | <b>Salicylate synthetase/ iron acquisition</b>     | 15.3                 |
| 27   | <i>rpsJ</i>  | YPO0209   | 30S ribosomal protein S10                          | 15.2                 |
| 28   | <i>ompA</i>  | YPO1435   | Putative outer membrane porin A protein            | 15.0                 |
| 29   | <i>lcrE</i>  | YPCD1.39c | <b>Membrane-bound Yop targeting protein</b>        | 15.0                 |
| 30   | <i>rplB</i>  | YPO0213   | 50S ribosomal protein l2                           | 14.9                 |

\*Hybridization signal of the gene of interest divided by the average signal of all 4,683 *Y. pestis* genes on the microarray; —, gene not annotated. Genes shown in bold are known virulence factors.
