# Supplementary material
Source: PubMed Central journal article supplement (PMC1544244)
Supplement: pnas_0601182103_7.pdf [file pnas_0601182103_7.pdf]

**Table 4. Primers and probes used for real time RT-PCR verification of microarray results**

| Gene                     | Primers 5'→3'                                         | Probe 5'→3'                  |
|--------------------------|-------------------------------------------------------|------------------------------|
| YPO0088 ( <i>fpr</i> )   | F: GGAGCGTTTCAAGCATTTGG<br>R: GCGGTAGGTAGCTGAGGTCATG  | ACTGGTACACGCCGCACGCTTTG      |
| YPO0682 ( <i>exbB</i> )  | F: TCATGAACAGCTTTATCGGCATT<br>R: CAATCCCTGGAGCGATAACC | CCCACTCACAGACCACCAATCTGG     |
| YPO1068 ( <i>proS</i> )  | F: ACGCGCACCCGGCTACA<br>R: CTCGGCGATGGTTTTTGC         | AGAGCTGCGAATCGTTGACACCCC     |
| YPO1916 ( <i>ybtS</i> )  | F: GCTGAACTGGAGGCCGTTT<br>R: GCGAACCGACATTAAATCTTC    | ACCACCACGCTGCCCGGCT          |
| YPO2422 ( <i>pmrF</i> )  | F: CCAATCCTCGGAATACCT<br>R: TTCACGCTCGGCGTGAT         | CGGCGGACGACAGAGATTACGGTC     |
| YPO2651 ( <i>nrdH</i> )  | F: CCATGTCAAATCGTTGGGTTATC<br>R: GTGGAAGCCTGACCAATGCT | ATCTCCTGCCACAATCACGGGAAGTTG  |
| YPO2705 ( <i>yfiD</i> )  | F: CGAGATCGAATATCGCGAAGT<br>R: CGTTCAGATGCTGACCACCTT  | CCACTGGAAGTGCAACCAACTGTACGTG |
| YPO2908 ( <i>hmp</i> )   | F: CGGAAGCGGCGTAAGGT<br>R: TGAAAGCCAGATTTATCAGCAAAG   | CTCCAACCACCGGTTTCCGTCT       |
| YPO2982 ( <i>mntH</i> )  | F: TGCTGCGGCCACTGTTT<br>R: CCCACGACCGTTGATGAAAG       | TTGAGCTTAATCGCCGCCG          |
| YPO2995 ( <i>crr</i> )   | F: GCCCTCTGGCAATAAAATGG<br>R: AGCATGGTTGGTCTCGAAAATT  | CTCCTGTTGACGGCACCATCGGT      |
| YPO3725 ( <i>aceA</i> )  | F: GGCATATGGGCGGTAAGGTA<br>R: CGGGCAGCAACCAGCTT       | TGGTGCCGACACAAGAGGCCATTC     |
| YPO3788 ( <i>metE</i> )  | F: ATCGGCCATAACATCGACACT<br>R: GACCCGTAACCACATCAACATG | CCGCGCTCTGCCAGTGCAAG         |
| YPMT1.84 ( <i>cafI</i> ) | F: CACCACTGCAACGGCAACT<br>R: TTGGAGCGCCTTCCTTATATGT   | TTGTTGAACCAGCCCGCATCACTCT    |

F, forward; R, reverse.
