# Supplementary material
Source: PubMed Central journal article supplement (PMC1544244)

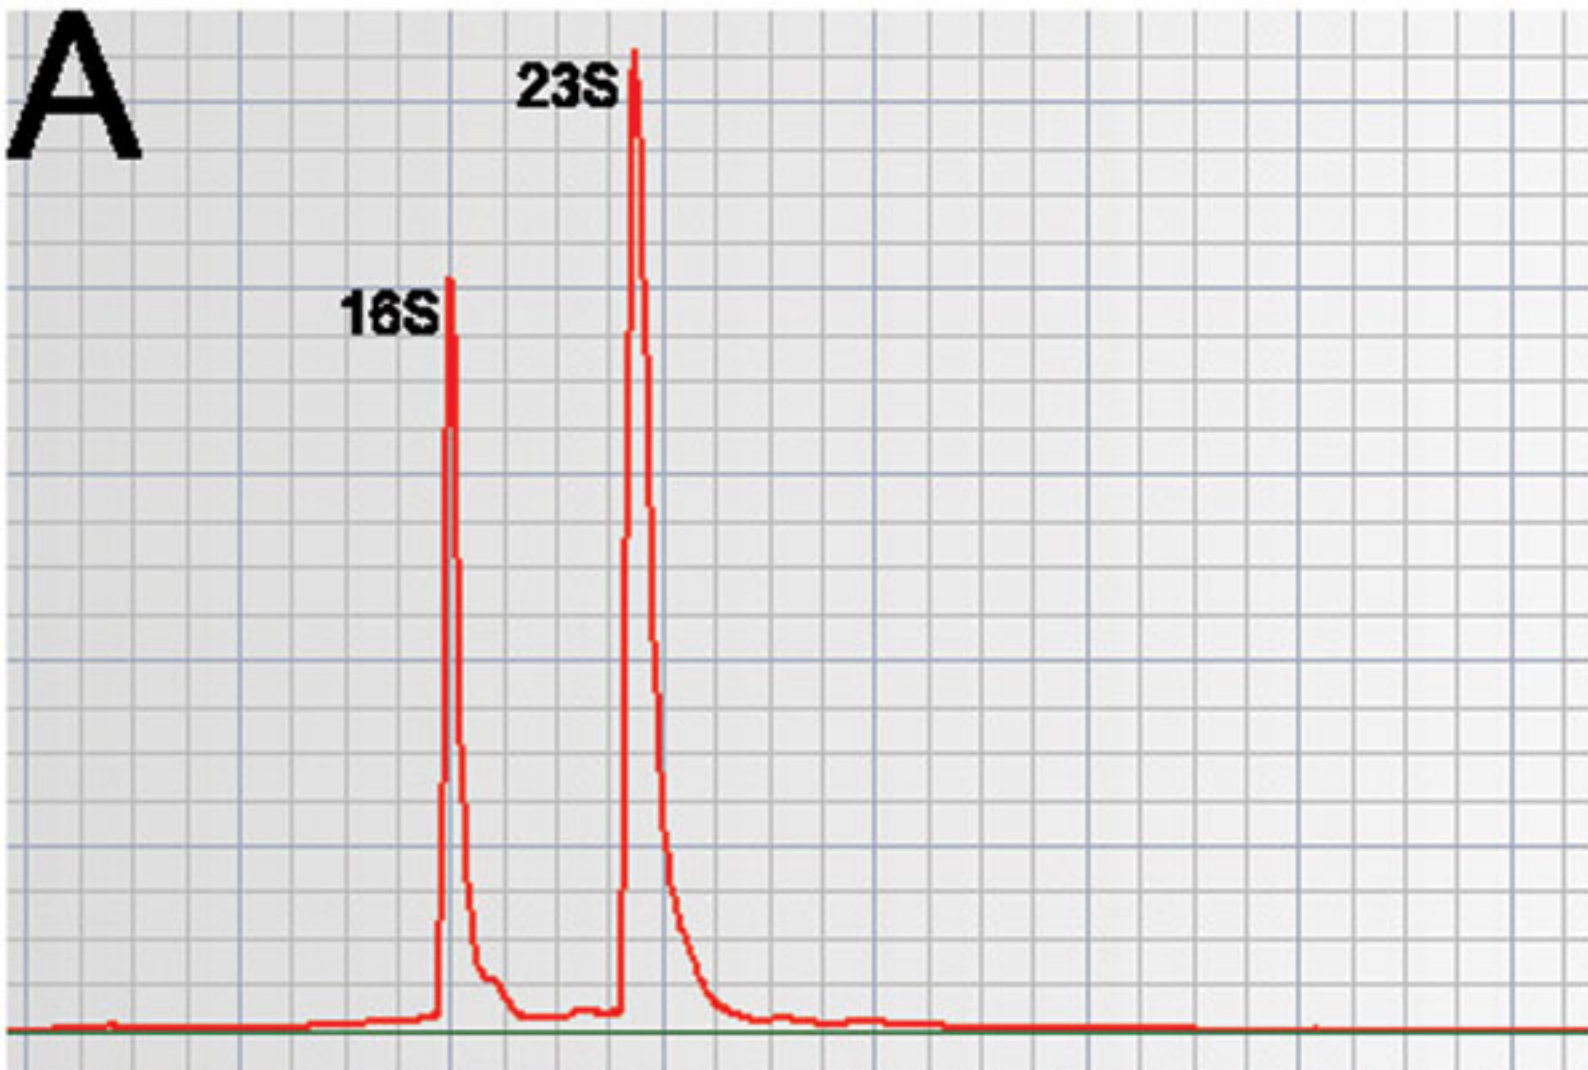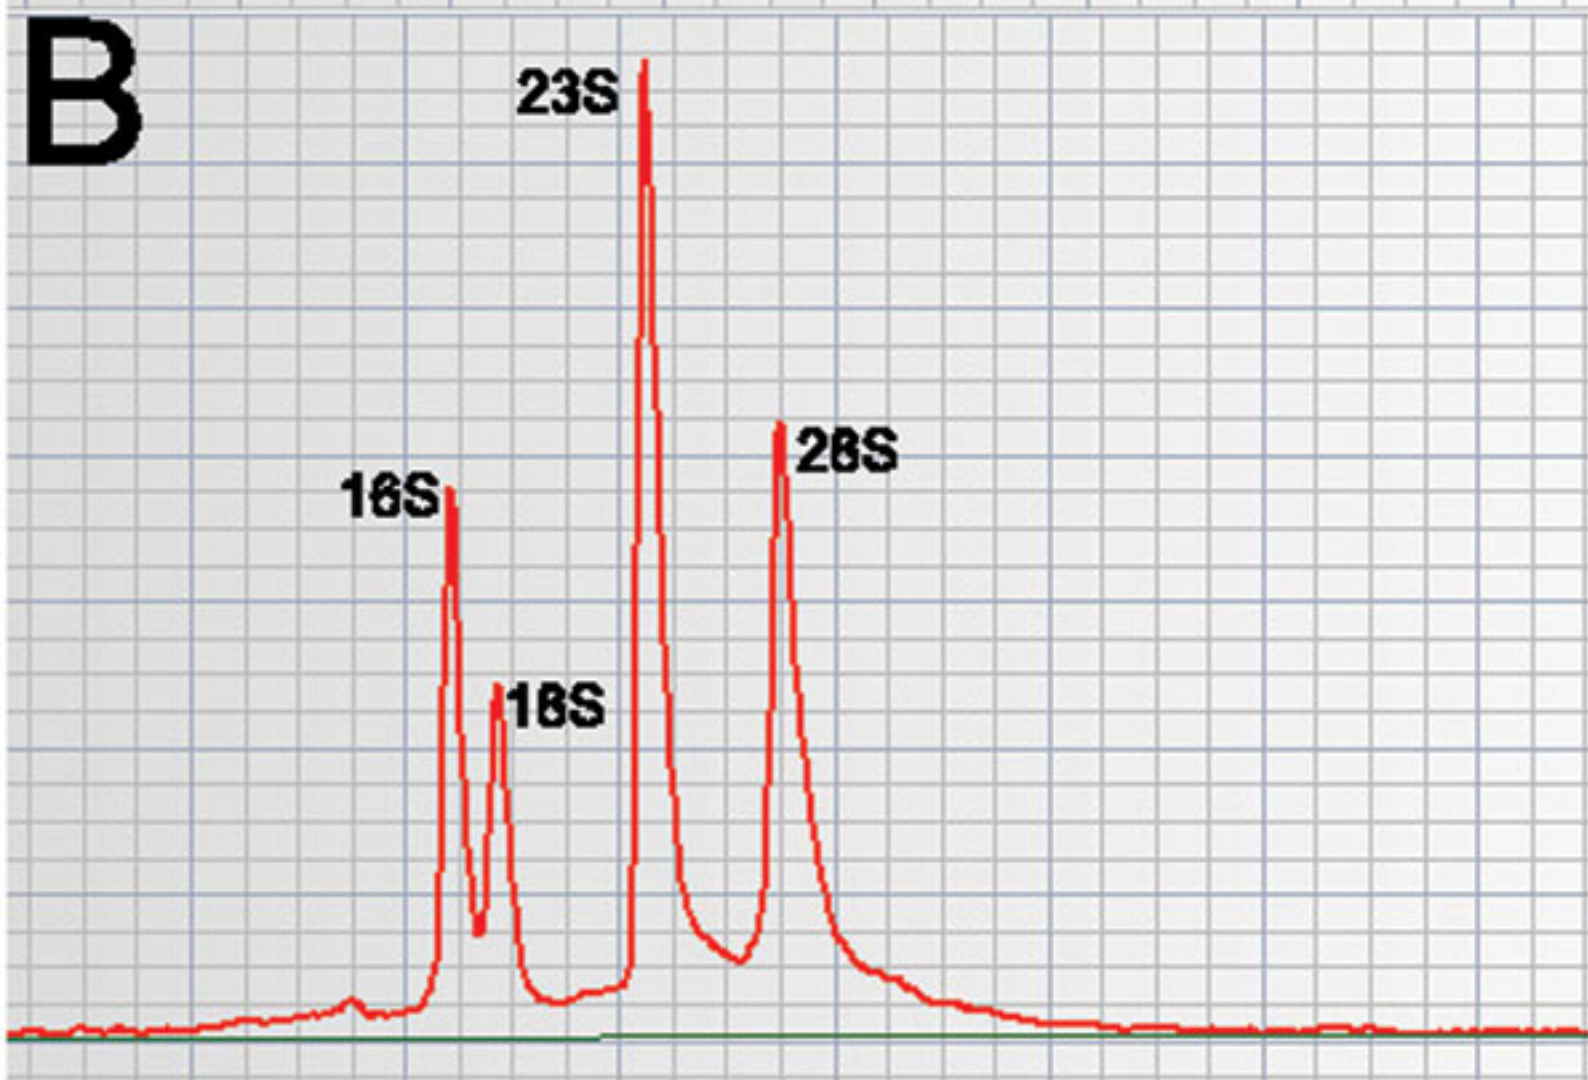

Supplement: pnas_0601182103_1.pdf [file pnas_0601182103_1.pdf]

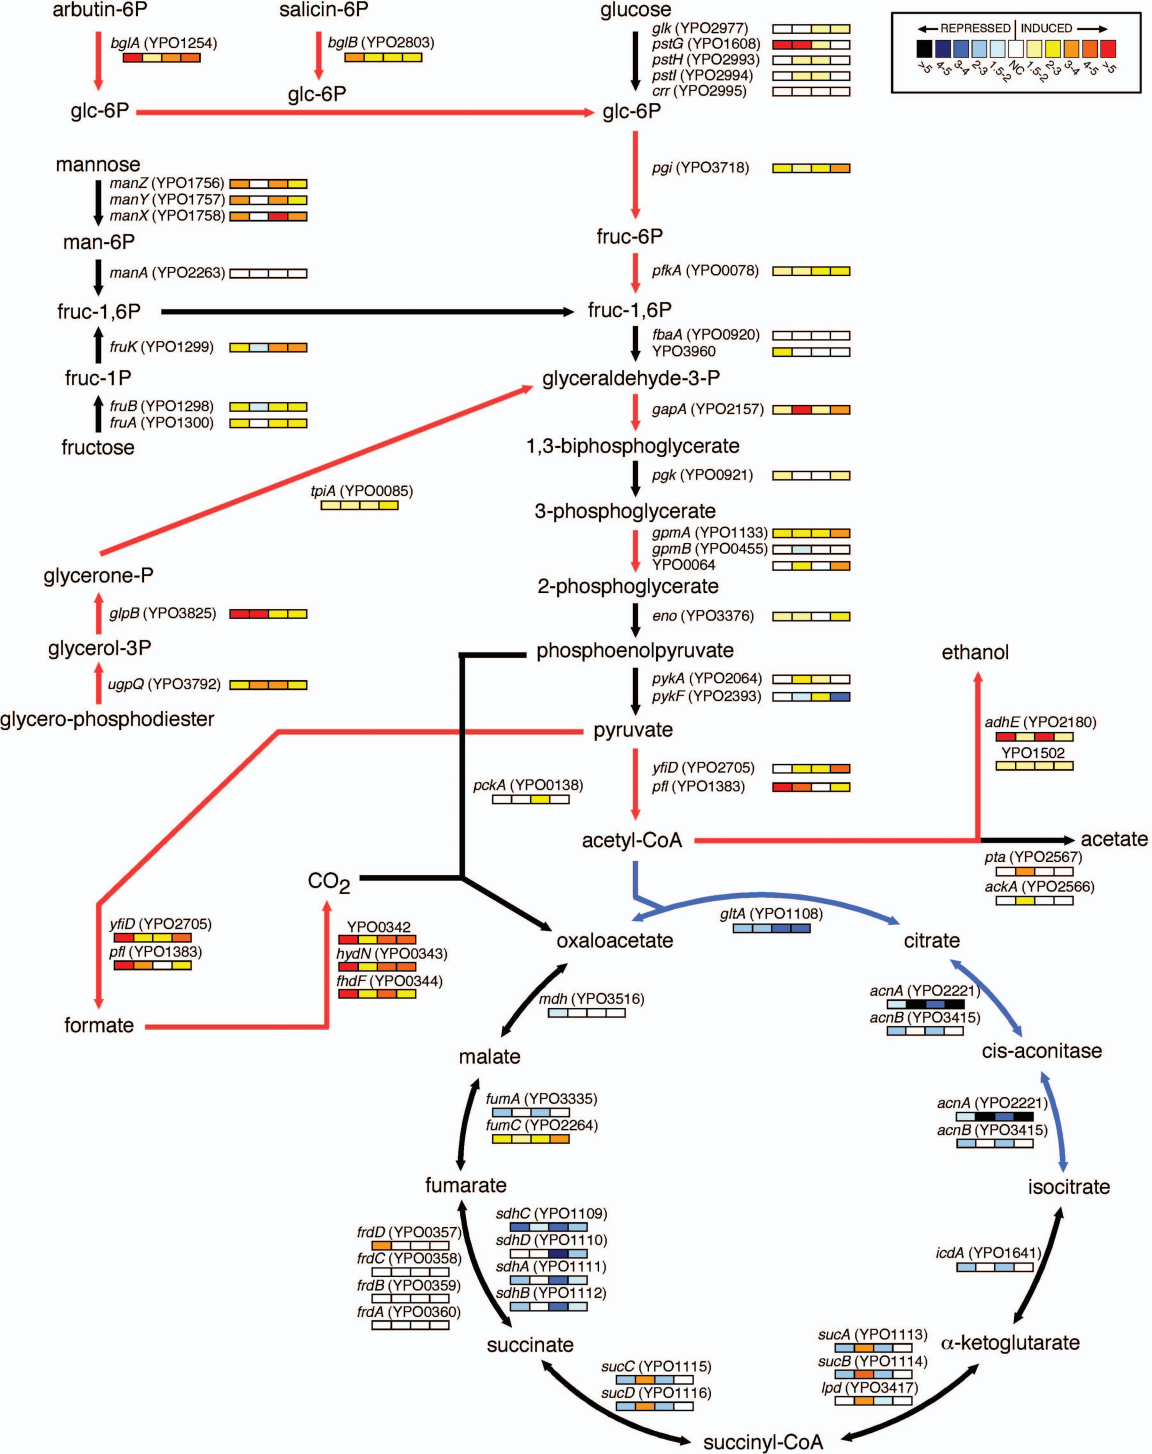

Supplement: pnas_0601182103_2.pdf [file pnas_0601182103_2.pdf]

**A**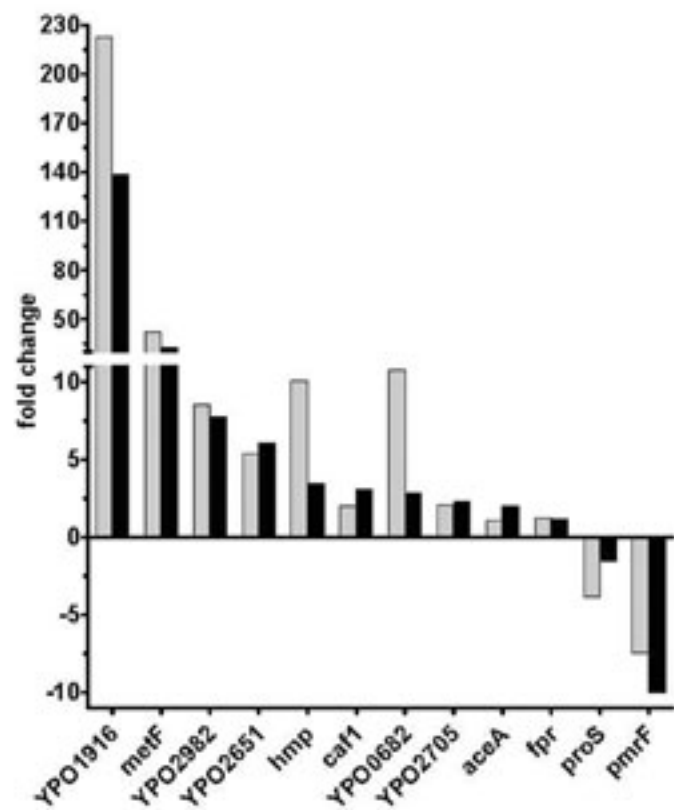**B**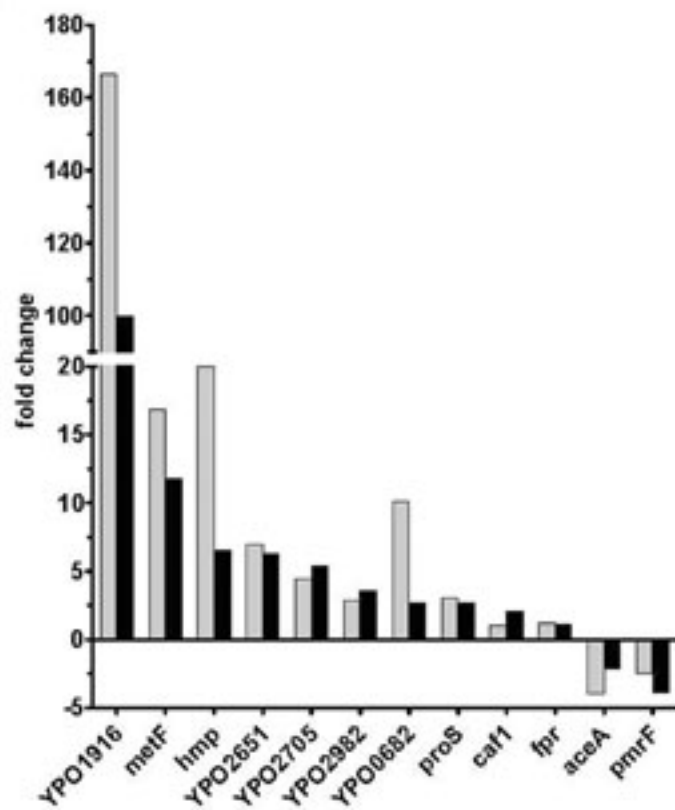**C**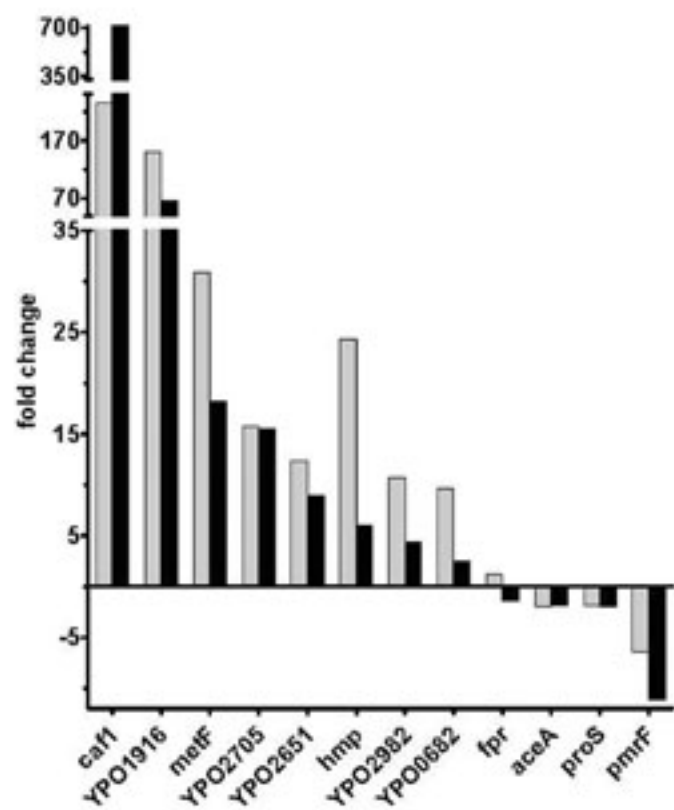**D**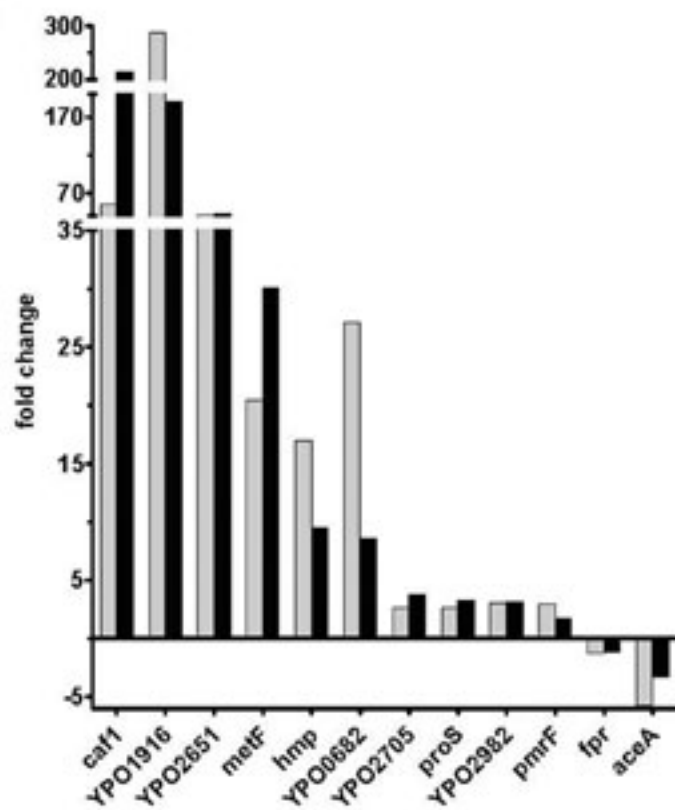

Supplement: pnas_0601182103_3.pdf [file pnas_0601182103_3.pdf]
